# Supplementary material
Source: HighWire-hosted journal article supplement (https://www.cmaj.ca/content/suppl/2017/10/31/189.44.E1352)
Supplement: 160778-res-visual-abstract.pdf [file 160778-res-visual-abstract.pdf]

# DEATH AMONG YOUNG INDIGENOUS PEOPLE WHO USE DRUGS

## Question

What are the predictors and rates of mortality among young Indigenous people who use drugs in BC?

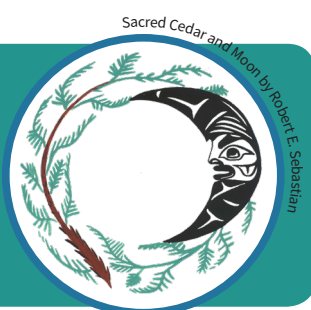

## Background

Indigenous leaders are concerned that their young people **ARE DYING PREMATURELY.**

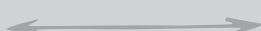

Of greatest concern are those:

- in the **CHILD WELFARE** system
- entrenched in **SUBSTANCE USE**
- living with **HIV** or **HEPATITIS C**

## Study

- Governed by the Cedar Project Partnership, an independent body of Indigenous Elders, leaders and experts.
- Data collected every 6 months from 2003 to 2014 in Vancouver and Prince George, BC.

## Results

DURING THE STUDY PERIOD **40** **YOUNG INDIGENOUS PEOPLE DIED**

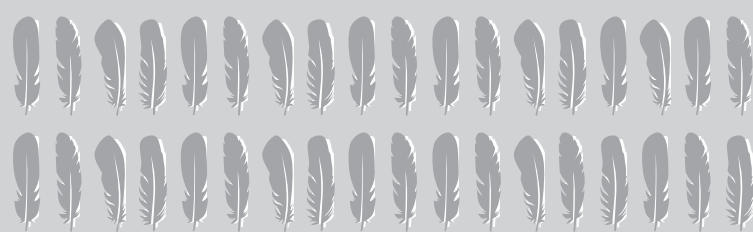

**YOUNG INDIGENOUS PEOPLE WHO USED DRUGS:**

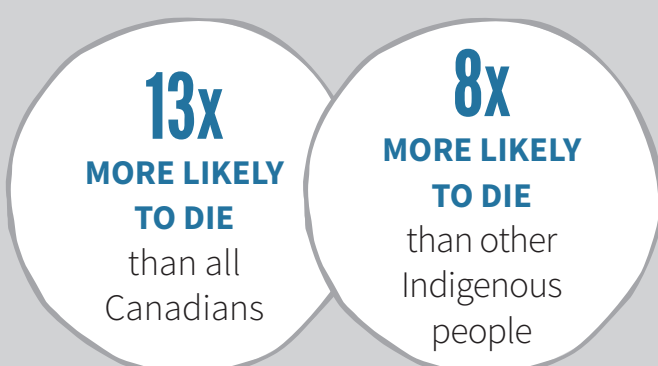

**MOST AFFECTED:**

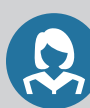

Young Indigenous women

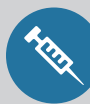

Those using drugs by injection

**LEADING CAUSES OF DEATH:**

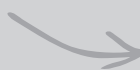

- 1 > Overdose
- 2 > Illness
- 3 > Suicide

## Interpretation

1. The high rate of death among young Indigenous people who use drugs reflects complex intersections of historic and present-day injustices, substance use and barriers to care.
2. The period immediately after a nonfatal overdose may be a critical time for intervention.
3. There is a pressing need for trauma-informed and culturally safe care.
